# Supplementary material
Source: ML conference proceedings conference paper supplement (https://proceedings.neurips.cc/paper_files/paper/2019/hash/eae27d77ca20db309e056e3d2dcd7d69-Abstract.html)
Supplement: Supplementary file [file eae27d77ca20db309e056e3d2dcd7d69-Supplemental.zip]

## A Appendix

### A.1 Proof of Theorem 8

In order to prove the theorem, we make use of the dual form of the restricted variational form of an  $f$ -divergence:

**Theorem 15 ([21], Theorem 3)** *Let  $f : \mathbb{R} \rightarrow (-\infty, \infty]$  denote a convex function with property  $f(1) = 0$  and suppose  $H$  is a convex subset of  $\mathcal{F}(\mathcal{X}, \mathbb{R})$  with the property that for any  $h \in H$  and  $b \in \mathbb{R}$ , we have  $h + b \in H$ . Then for any  $P, Q \in \mathcal{P}(\mathcal{X})$  we have*

$$\sup_{h \in H} \{\mathbb{E}_{x \sim P}[h(x)] - \mathbb{E}_{x \sim Q}[f^*(h(x))]\} = \inf_{P' \in \mathcal{P}(\mathcal{X})} \left\{ D_f(P', Q) + \sup_{h \in H} \{\mathbb{E}_P[h(x)] - \mathbb{E}_{P'}[h(x)]\} \right\}$$

The goal is now to set  $H = \mathcal{H}_c$  however there are some conditions of the above that we require

**Lemma 16** *If  $c$  is a metric then  $\mathcal{H}_c$  is convex and closed under addition.*

**Proof** Let  $f \in \mathcal{H}_c$  and consider define  $h = f + b$  for some  $b \in \mathbb{R}$ , we then have

$$\begin{aligned} |h(x) - h(y)| &= |f(x) + b - f(y) - b| \\ &= |f(x) - f(y)| \\ &\leq c(x, y) \end{aligned}$$

Consider some  $\lambda \in [0, 1]$  and set  $h(x) = \lambda \cdot f(x) + (1 - \lambda) \cdot g(x)$  for some  $f, g \in \mathcal{H}_c$ . We then have

$$\begin{aligned} |h(x) - h(y)| &= |\lambda \cdot f(x) + (1 - \lambda) \cdot g(x) - \lambda \cdot f(y) - (1 - \lambda) \cdot g(y)| \\ &= |\lambda \cdot (f(x) - f(y)) + (1 - \lambda) \cdot (g(x) - g(y))| \\ &\leq \lambda \cdot |f(x) - f(y)| + (1 - \lambda) \cdot |g(x) - g(y)| \\ &\leq \lambda \cdot c(x, y) + (1 - \lambda) \cdot c(x, y) \\ &= c(x, y) \end{aligned}$$

for all  $x, y \in \mathcal{X}$ . ■

We require a lemma regarding the decomposibility of  $G$  for  $f$ -divergences.

**Lemma 17** *Let  $G : \mathcal{Z} \rightarrow \mathcal{X}$  and let  $P, Q$  be two distributions over  $\mathcal{Z}$ . We have that*

$$D_f(G \# P, G \# Q) \leq D_f(P, Q),$$

*with equality if  $G$  is invertible. Furthermore, if  $f$  is differentiable then we have equality for a weaker condition: for any  $z, z' \in \mathcal{Z}$ ,  $G(z) = G(z') \implies f'(\frac{dP}{dQ}(z)) = f'(\frac{dP}{dQ}(z'))$ .*

**Proof** By writing the variational form from [15] (Lemma 1), we have

$$\begin{aligned} D_f(G \# P, G \# Q) &= \sup_{h \in \mathcal{F}(\mathcal{X}, \mathbb{R})} \{\mathbb{E}_{x \sim G \# P}[h(x)] - \mathbb{E}_{x \sim G \# Q}[f^*(h(x))]\} \\ &= \sup_{h \in \mathcal{F}(\mathcal{X}, \mathbb{R})} \{\mathbb{E}_{z \sim P}[h(G(z))] - \mathbb{E}_{z \sim Q}[f^*(h(G(z)))]\} \\ &= \sup_{h \in \mathcal{F}(\mathcal{X}, \mathbb{R}) \circ G} \{\mathbb{E}_{z \sim P}[h(z)] - \mathbb{E}_{z \sim Q}[f^*(h(z))]\} \\ &\leq \sup_{h \in \mathcal{F}(\mathcal{Z}, \mathbb{R})} \{\mathbb{E}_{z \sim P}[h(z)] - \mathbb{E}_{z \sim Q}[f^*(h(z))]\} \\ &= D_f(P, Q), \end{aligned}$$

where we used the fact that  $\mathcal{F}(\mathcal{X}, \mathbb{R}) \circ G \subseteq \mathcal{F}(\mathcal{Z}, \mathbb{R})$ . If  $G$  is invertible then we applying the above with  $G \leftarrow G^{-1}$ ,  $P \leftarrow G \# P$  and  $Q \leftarrow G \# Q$ , we have

$$D_f(G^{-1} \# (G \# P), G^{-1} \# (G \# Q)) \leq D_f(G \# P, G \# Q),$$

which is just the reverse direction  $D_f(P, Q) \leq D_f(G\#P, G\#Q)$ , and so equality holds. Suppose now that  $f$  is differentiable then note that inequality holds when  $f'(dP/dQ) \in \mathcal{F}(\mathcal{X}, \mathbb{R}) \circ G$  (See proof of Lemma 1 in [15]), which is equivalent to asking if there exists a function  $\varphi_f \in \mathcal{F}(\mathcal{X}, \mathbb{R})$  such that

$$\varphi_f \circ G = f' \left( \frac{dP}{dQ} \right).$$

For any  $z \in \mathcal{Z}$ , we can construct  $\varphi_f$  to map  $G(z)$  to  $f' \left( \frac{dP}{dQ} \right) (z)$  and due to the condition in the lemma, we can guarantee  $\varphi_f$  will indeed be a function and thus exists. ■

We need a Lemma that will allow us to upper bound the Wasserstein distance.

**Lemma 18** *For any  $E \in \mathcal{F}(\mathcal{X}, \mathcal{P}(\mathcal{Z}))$ ,  $G \in \mathcal{F}(\mathcal{Z}, \mathcal{X})$  and  $c : \mathcal{X} \times \mathcal{X} \rightarrow \mathbb{R}$ , we have*

$$W_c((G \circ E)\#P_X, P_X) \leq \int_{\mathcal{X}} \mathbb{E}_{z \sim E(x)} [c(x, G(z))] dP_X(x).$$

**Proof** We quote a reparametrization result from [6] Theorem 1 that if  $G$  is deterministic then the Wasserstein distance can be reparametrized as

$$\begin{aligned} W_c(G\#(E\#P_X), P_X) &= \inf_{Q \in \mathcal{F}(\mathcal{X}, \mathcal{P}(\mathcal{Z})): Q\#P_X = E\#P_X} \int_{\mathcal{X}} \mathbb{E}_{z \sim Q(x)} [c(x, G(z))] dP_X(x) \quad (11) \\ &\leq \int_{\mathcal{X}} \mathbb{E}_{z \sim E(x)} [c(x, G(z))] dP_X(x). \end{aligned}$$

■

We also need a Lemma regarding the relationship between  $\overline{W}$  and WAE.

**Lemma 19** *Let  $f : \mathbb{R} \rightarrow (-\infty, \infty]$  be a convex function with  $f(1) = 0$ , then we have*

$$\overline{W}_{c, \lambda, f}(P_X, G) \leq \text{WAE}_{c, \lambda, D_f}(P_X, G).$$

**Proof** Consider the optimal encoder  $E^*$  from the  $f$ -WAE objective. Let  $Q^* = E^*\#P_X$ . We then have that

$$\overline{W}_{c, \lambda, f}(P_X, G) = W_c(P_X, G\#Q^*) + \lambda \cdot D_f(Q^*, P_Z).$$

Let  $\pi \in \Pi(P_X, E\#Q^*)$  be the optimal coupling under the metric  $c$ . By the Gluing lemma [14], one can construct a triple  $(X, Y, Z)$  where  $(X, Y) \sim \pi$ ,  $Z \sim Q^*$  and  $Y = G(Z)$  almost surely. Let  $\pi'$  be the distribution over  $(Y, Z)$  and consider the conditional distribution over  $Z$  given  $Y$ , associated with  $E_{\pi'} \in \mathcal{F}(\mathcal{X}, \mathcal{P}(\mathcal{Z}))$ . We have  $E_{\pi'}\#P_X = Q^*$  and so we have

$$\begin{aligned} \text{WAE}_{c, \lambda, D_f}(P_X, G) &\leq \int_{\mathcal{X}} \mathbb{E}_{z \sim E_{\pi'}(y)} [c(x, G(z))] dP_X + D_f(E_{\pi'}\#P_X, P_Z) \\ &= \int_{\mathcal{X}} \mathbb{E}_{z \sim E_{\pi'}(y)} [c(x, G(z))] dP_X + D_f(Q^*, P_Z) \\ &= \int_{\mathcal{X} \times \mathcal{X}} [c(x, y)] d\pi'(x, y) + D_f(Q^*, P_Z) \\ &= W_c(P_X, G\#Q^*) + \lambda \cdot D_f(Q^*, P_Z). \\ &= \overline{W}_{c, \lambda, f}(P_X, G). \end{aligned}$$

■

Finally, we need a lemma to justify reparametrizations.

**Lemma 20** *If  $G : \mathcal{Z} \rightarrow \mathcal{X}$  is invertible then for any  $P' \in \mathcal{P}(\mathcal{X})$  such that  $P' \ll P_G$ , then there exists an  $E \in \mathcal{F}(\mathcal{X}, \mathcal{P}(\mathcal{Z}))$  such that  $P' = G\#E\#P_X$ .*

**Proof** From the assumption, we have  $\text{Supp}(P') \subseteq \text{Supp}(P_G) \subseteq \text{Im}(G)$  and so by invertibility of  $G$ , we can set  $Q = G^{-1} \# P'$  and construct a conditional distribution  $E$  (between marginals  $Q$  and  $P_X$ ) to get  $Q = E \# P_X$ , hence  $P' = G \# E \# P_X$ .  $\blacksquare$

We are now ready to prove the theorem. Set  $H = \mathcal{H}_c$  (the set of 1-Lipschitz functions) and note that  $\lambda f$  is a convex function satisfying  $\lambda f(1) = 0$  and so substituting  $f \leftarrow \lambda f$ , we get that  $D_{\lambda f}(\cdot, \cdot) = \lambda D_f(\cdot, \cdot)$ . Hence, we have

$$\begin{aligned}
\text{GAN}_{\lambda f}(P_X, G; \mathcal{H}_c) &= \sup_{h \in H_c} \{ \mathbb{E}_{x \sim P_X} [h(x)] - \mathbb{E}_{x \sim P_G} [(\lambda f)^*(h(x))] \} \\
&= \inf_{P' \in \mathcal{P}(\mathcal{X})} \{ \lambda D_f(P', P_G) + W_c(P', P_X) \} \\
&= \inf_{P' \in \mathcal{P}(\mathcal{X}): P' \ll P_G} \{ \lambda D_f(P', P_G) + W_c(P', P_X) \} \\
&= \inf_{E \in \mathcal{F}(\mathcal{X}, \mathcal{P}(\mathcal{Z}))} \{ \lambda D_f((G \circ E) \# P_X, G \# P_Z) + W_c((G \circ E) \# P_X, P_X) \} \\
&\stackrel{(*)}{\leq} \inf_{E \in \mathcal{F}(\mathcal{X}, \mathcal{P}(\mathcal{Z}))} \{ \lambda D_f(E \# P_X, P_Z) + W_c((G \circ E) \# P_X, P_X) \} \\
&= \overline{W}_{c, \lambda \cdot f}(P_X, G) \\
&\leq \inf_{E \in \mathcal{F}(\mathcal{X}, \mathcal{P}(\mathcal{Z}))} \left\{ \int_{\mathcal{X}} \mathbb{E}_{z \sim E(x)} [c(x, G(z))] dP_X(x) + \lambda D_f(E \# P_X, P_Z) \right\} \\
&= \text{WAE}_{c, \lambda \cdot D_f}(P_X, G),
\end{aligned} \tag{12}$$

where (12) is an equality when  $G$  is invertible from Lemma 20 and  $(*)$  is  $=$  if  $G$  satisfies the requirement of Lemma 17. To prove the final inequality, note that if  $E^*$  satisfies the condition of the Theorem then

$$\begin{aligned}
\overline{W}_{c, \lambda \cdot f}(P_X, G) &= W_c((G \circ E^*) \# P_X, P_X) + \lambda D_f(E^* \# P_X, P_Z) \\
&= W_c(G \# (E^* \# P_X), P_X) \\
&= W_c(P_G, P_X).
\end{aligned} \tag{14}$$

Next, notice that

$$\begin{aligned}
&\text{WAE}_{c, \lambda \cdot D_f}(P_X, G) \\
&= \inf_{E \in \mathcal{F}(\mathcal{X}, \mathcal{P}(\mathcal{Z}))} \left\{ \int_{\mathcal{X}} \mathbb{E}_{z \sim E(x)} [c(x, G(z))] dP_X(x) + \lambda D_f(E \# P_X, P_Z) \right\} \\
&\leq \inf_{E \in \mathcal{F}(\mathcal{X}, \mathcal{P}(\mathcal{Z})): E \# P_X = P_Z} \left\{ \int_{\mathcal{X}} \mathbb{E}_{z \sim E(x)} [c(x, G(z))] dP_X(x) + \lambda D_f(E \# P_X, P_Z) \right\} \\
&\leq \inf_{E \in \mathcal{F}(\mathcal{X}, \mathcal{P}(\mathcal{Z})): E \# P_X = P_Z} \left\{ \int_{\mathcal{X}} \mathbb{E}_{z \sim E(x)} [c(x, G(z))] dP_X(x) \right\} \\
&= W_c(P_X, P_G) \\
&= \overline{W}_{c, \lambda \cdot f}(P_X, G),
\end{aligned} \tag{15}$$

where (15) follows from the reparametrized Wasserstein distance from [6] (Theorem 1), which we used in (11) and the final step follows from (14). Combining  $\text{WAE}_{c, \lambda \cdot D_f}(P_X, G) \leq \overline{W}_{c, \lambda \cdot f}(P_X, G)$  with  $\text{WAE}_{c, \lambda \cdot D_f}(P_X, G) \geq \overline{W}_{c, \lambda \cdot f}(P_X, G)$  (from 13) yields equality and concludes the proof.

## A.2 Proof of Theorem 13

We first prove a lemma that will apply to both cases. Recalling that for any metric space  $(\mathcal{X}, c)$  and  $P \in \mathcal{P}(\mathcal{X})$  we define  $\Delta_{P, c} = \text{diam}_c(\text{supp}(P))$ .

**Lemma 21** *Let  $(\mathcal{X}, c)$  be a metric space. For any  $P \in \mathcal{P}(\mathcal{X})$ , suppose  $\Delta_{P, c} < \infty$  and let  $\hat{P}$  denote the empirical distribution after drawing  $n$  i.i.d samples for some  $n \in \mathbb{N}_*$ . If  $s > d^*(P)$ , then we have*

$$\text{IPM}_{\mathcal{H}_c}(P, \hat{P}) \leq O(n^{-1/s}) + \frac{\Delta_{P, c}}{2} \sqrt{\frac{2}{n} \ln \left( \frac{1}{\delta} \right)}$$

**Proof** We appeal to McDiarmind's Inequality and use a standard method, as shown in [32], to bound the quantity.

**Theorem 22 (McDiarmind's Inequality)** *Let  $X_1, \dots, X_n$  be  $n$  independent random variables and consider a function  $\Phi : \mathcal{X}^n \rightarrow \mathbb{R}$  such that there exists constants  $c_i > 0$  (for  $i = 1, \dots, n$ ) with*

$$\sup_{x_1, \dots, x_n, x'_i} |\Phi(x_1, \dots, x_n) - \Phi(x_1, \dots, x_{i-1}, x'_i, x_{i+1}, \dots, x_n)| \leq c_i.$$

*Then for any  $t > 0$ , we have*

$$\Pr[\Phi(X_1, \dots, X_n) - \mathbb{E}[\Phi(X_1, \dots, X_n)] \geq t] \leq \exp\left(\frac{-2t^2}{\sum_{i=1}^n c_i^2}\right)$$

Let  $\mathcal{F} = \mathcal{H}_c$  then let

$$\Phi(S) = \text{IPM}_{\mathcal{H}_c}(P, \hat{P}).$$

Noting that

$$\begin{aligned} |\Phi(x_1, \dots, x_n) - \Phi(x_1, \dots, x_{i-1}, x'_i, x_{i+1}, \dots, x_n)| &\leq \frac{1}{n} |f(x_i) - f(x'_i)| \\ &\leq \frac{1}{n} \cdot c(x_i, x'_i) \\ &\leq \frac{\Delta_{P,c}}{n}, \end{aligned}$$

where the first inequality follows as each  $f$  is 1-Lipschitz and the second follows from the fact that each  $x, x' \in \text{supp}(P)$ . This allows us to set  $c_i = \Delta/n$  for all  $i = 1, \dots, n$ . Now applying McDiarmind's inequality with  $t = \Delta_{P,c}/2\sqrt{\frac{2}{n} \ln\left(\frac{1}{\delta}\right)}$  yields (for a sample  $S \sim P^n$ )

$$\begin{aligned} \Pr\left[\Phi(S) - \mathbb{E}\Phi(S) \geq \frac{\Delta_{P,c}}{2} \sqrt{\frac{2}{n} \ln\left(\frac{1}{\delta}\right)}\right] &\leq \delta \\ \Pr\left[\Phi(S) - \mathbb{E}\Phi(S) \leq \frac{\Delta_{P,c}}{2} \sqrt{\frac{2}{n} \ln\left(\frac{1}{\delta}\right)}\right] &\geq 1 - \delta, \end{aligned}$$

and thus

$$\Phi(S) \leq \mathbb{E}\Phi(S) + \frac{\Delta_{P,c}}{2} \sqrt{\frac{2}{n} \ln\left(\frac{1}{\delta}\right)}.$$

Noting that  $\mathbb{E}\Phi(S) = \mathbb{E}[W_c(P, \hat{P})]$  (from Lemma 4), we appeal to a case of Theorem 1 in [30] where  $p = 1$ , which tells us that if  $s > d^*(P)$  then  $\mathbb{E}[W_c(P, \hat{P})] = O(n^{-1/s})$ . Since this is the requirement in the lemma, the proof concludes.  $\blacksquare$

We will make use of this lemma for both  $P_X$  and  $P_G$  and use  $\Delta$  for both cases since  $\Delta \geq \Delta_{P_X,c}$  and  $\Delta \geq \Delta_{P_G,c}$ . For the general case of any  $f$ , let (abusing notation)  $G = \text{GAN}_{\lambda f}(P_X, G; \mathcal{H}_c)$  and  $\hat{G}$  denote the empirical counterpart with  $n$  samples, and let  $h^1, h^2 \in \mathcal{H}_c$  denote their witness functions. We then have

$$G - \hat{G}$$

$$\begin{aligned} &= \sup_{h \in \mathcal{H}_c} \{\mathbb{E}_{x \sim P_X}[h(x)] - \mathbb{E}_{x \sim P_G}[(\lambda f)^*(h(x))]\} - \sup_{h \in \mathcal{H}_c} \{\mathbb{E}_{x \sim \hat{P}_X}[h(x)] - \mathbb{E}_{x \sim P_G}[(\lambda f)^*(h(x))]\} \\ &= \mathbb{E}_{x \sim P_X}[h^1(x)] - \mathbb{E}_{x \sim P_G}[(\lambda f)^*(h^1(x))] - \mathbb{E}_{x \sim \hat{P}_X}[h^2(x)] + \mathbb{E}_{x \sim P_G}[(\lambda f)^*(h^2(x))] \\ &\leq \mathbb{E}_{x \sim P_X}[h^1(x)] - \mathbb{E}_{x \sim \hat{P}_X}[h^1(x)] + \mathbb{E}_{x \sim P_G}[(\lambda f)^*(h^1(x))] - \mathbb{E}_{x \sim P_G}[(\lambda f)^*(h^1(x))] \\ &= \mathbb{E}_{x \sim P_X}[h^1(x)] - \mathbb{E}_{x \sim \hat{P}_X}[h^1(x)] \\ &\leq \sup_{h \in \mathcal{H}_c} \{\mathbb{E}_{x \sim P_X}[h(x)] - \mathbb{E}_{x \sim \hat{P}_X}[h(x)]\} \\ &= \text{IPM}_{\mathcal{H}_c}(P_X, \hat{P}_X) \\ &\leq O(n^{-1/s_X}) + \frac{\Delta}{2} \sqrt{\frac{2}{n} \ln\left(\frac{1}{\delta}\right)}, \end{aligned}$$

where the last step is an application of Lemma 21. Applying Theorem 8, we get  $\hat{G} \leq \overline{W}_{c,\lambda,f}$  and rearrangement of the above shows the first bound. For the case of  $f(x) = |x - 1|$ , note that if  $\mathcal{F} \subseteq \mathcal{F}(\mathcal{X}, \mathbb{R})$  is such that  $-\mathcal{F} = \mathcal{F}$ , then  $\text{IPM}_{\mathcal{F}}$  is a pseudo-metric and satisfies the triangle inequality, which allows us to have

$$\begin{aligned} \text{IPM}_{\mathcal{F}}(P_X, P_G) &\leq \text{IPM}_{\mathcal{F}}(P_X, \hat{P}_X) + \text{IPM}_{\mathcal{F}}(\hat{P}_X, P_G) \\ &\leq \text{IPM}_{\mathcal{F}}(P_X, \hat{P}_X) + \text{IPM}_{\mathcal{F}}(P_G, \hat{P}_G) + \text{IPM}_{\mathcal{F}}(\hat{P}_X, \hat{P}_G). \end{aligned} \quad (17)$$

Next, we set  $\mathcal{F} = \mathcal{F}_{c,\lambda}$ , and noting that  $\mathcal{F}_{c,\lambda} \subseteq \mathcal{H}_c$ , we have

$$\begin{aligned} \text{IPM}_{\mathcal{F}_{c,\lambda}}(P_X, P_G) &\leq \text{IPM}_{\mathcal{F}_{c,\lambda}}(P_X, \hat{P}_X) + \text{IPM}_{\mathcal{F}_{c,\lambda}}(P_G, \hat{P}_G) + \text{IPM}_{\mathcal{F}_{c,\lambda}}(\hat{P}_X, \hat{P}_G) \\ &\leq \text{IPM}_{\mathcal{H}_c}(P_X, \hat{P}_X) + \text{IPM}_{\mathcal{H}_c}(P_G, \hat{P}_G) + \text{IPM}_{\mathcal{H}_c}(\hat{P}_X, \hat{P}_G) \\ &\leq \text{IPM}_{\mathcal{H}_c}(\hat{P}_X, \hat{P}_G) + O(n^{-1/s_X} + n^{-1/s_G}) + \Delta \sqrt{\frac{2}{n} \ln \left( \frac{2}{\delta} \right)}, \end{aligned} \quad (18)$$

where the final inequality is an application of Lemma 21 like before. However since we use McDiarmind's inequality twice, we set  $\delta \leftarrow \delta/2$  and use union bound to have the above inequality with probability  $1 - \delta$ . The final step is to note that when  $f(x) = |x - 1|$  then for any  $\lambda > 0$ ,

$$(\lambda f)^*(x) = \begin{cases} x & x \leq \lambda \\ \infty & x > \lambda \end{cases}$$

and so we have

$$\begin{aligned} \text{GAN}_{\lambda f}(P_X, G; \mathcal{H}_c) &= \sup_{h \in \mathcal{H}_c} \{ \mathbb{E}_{x \sim P_X}[h(x)] - \mathbb{E}_{x \sim P_G}[(\lambda f)^*(h(x))] \} \\ &= \sup_{h \in \mathcal{H}_c: |h| \leq \lambda} \{ \mathbb{E}_{x \sim P_X}[h(x)] - \mathbb{E}_{x \sim P_G}[h(x)] \} \\ &= \sup_{h \in \mathcal{F}_{c,\lambda}} \{ \mathbb{E}_{x \sim P_X}[h(x)] - \mathbb{E}_{x \sim P_G}[h(x)] \} \\ &= \text{IPM}_{\mathcal{F}_{c,\lambda}}(P_X, P_G). \end{aligned}$$

By Theorem 8, we have  $\text{IPM}_{\mathcal{F}_{c,\lambda}}(\hat{P}_X, \hat{P}_G) = \text{GAN}_{\lambda f}(\hat{P}_X, G; \mathcal{H}_c) \leq \overline{W}_{c,\lambda,f}(\hat{P}_X, G)$  where  $\text{GAN}_{\lambda f}(\hat{P}_X, G; \mathcal{H}_c)$  is the objective with  $\hat{P}_X$  and  $\hat{P}_G$ . Putting this together with (18), we get

$$\begin{aligned} \text{GAN}_{\lambda f}(P_X, G; \mathcal{H}_c) &= \text{IPM}_{\mathcal{F}_{c,\lambda}}(P_X, P_G) \\ &\leq \text{IPM}_{\mathcal{H}_c}(\hat{P}_X, \hat{P}_G) + O(n^{-1/s}) + \Delta \sqrt{\frac{2}{n} \ln \left( \frac{1}{\delta} \right)} \\ &= \text{GAN}_{\lambda f}(\hat{P}_X, G; \mathcal{H}_c) + O(n^{-1/s}) + \Delta \sqrt{\frac{2}{n} \ln \left( \frac{1}{\delta} \right)} \\ &\leq \overline{W}_{c,\lambda,f}(\hat{P}_X, G) + O(n^{-1/s_X} + n^{-1/s_G}) + \Delta \sqrt{\frac{2}{n} \ln \left( \frac{2}{\delta} \right)}. \end{aligned}$$

### A.3 Proof of Theorem 9

First, using Theorem 8 and the fact that the  $f$ -GAN objective is a lower bound to  $D_f$ , we have that

$$\begin{aligned} \overline{W}_{\gamma \cdot c, f}(P_X, G) &= \text{GAN}_f(P_X, G, \mathcal{H}_{\gamma c}) \\ &\leq D_f. \end{aligned}$$

It is known that  $f'(dP_X/dP_G)$  is the maximizer of  $L(h) = \mathbb{E}_{x \sim P_X}[h(x)] - \mathbb{E}_{x \sim P_G}[f^*(h(x))]$  [15], and so the proof concludes by showing that  $f'(dP_X/dP_G) \in \mathcal{H}_{\gamma^* \cdot c}$ . Note that  $h \in \mathcal{H}_{\gamma \cdot c}$  if and only if for all  $x, x' \in \mathcal{X}$ ,  $x \neq x'$

$$\begin{aligned} |h(x) - h(x')| &\leq \gamma \cdot \delta_{x-x'}(0) \\ &= \gamma \end{aligned}$$

and so the 1-Lipschitz functions are those that are bounded by their maximum and minimum value by  $\gamma$ . For any  $x, x' \in \mathcal{X}, x \neq x'$  we have

$$\left| f' \left( \frac{dP_X}{dP_G} \right) (x) - f' \left( \frac{dP_X}{dP_G} \right) (x') \right| = \gamma^* \left| f' \left( \frac{dP_X}{dP_G} \right) (x) - f'(0) \right| \leq \gamma,$$

and thus  $f'(dP_X/dP_G) \in \mathcal{H}_{\gamma,c}$ .

#### A.4 Proof of Theorem 10

First note that

$$\begin{aligned} \text{WAE}_{c,\lambda,f}(P_X, P_G) &= \inf_{E \in \mathcal{F}(\mathcal{X}, \mathcal{P}(\mathcal{Z}))} \left\{ \int_{\mathcal{X}} \mathbb{E}_{z \sim E(x)} [c(x, G(z))] dP_X(x) + \lambda \cdot D_f(E \# P_X, P_Z) \right\} \\ &\leq \inf_{E \in \mathcal{F}(\mathcal{X}, \mathcal{P}(\mathcal{Z})): E \# P_X = P_Z} \left\{ \int_{\mathcal{X}} \mathbb{E}_{z \sim E(x)} [c(x, G(z))] dP_X(x) \right\} \\ &= W_c(P_X, P_G), \end{aligned}$$

where the last equality holds from [6] Theorem 1. Thus we have the chain of inequalities for all  $\lambda$  and  $f : \mathbb{R} \rightarrow (-\infty, \infty]$  (convex with  $f(1) = 0$ )

$$\text{GAN}_{\lambda f}(P_X, G; \mathcal{H}_c) \leq \overline{W}_{c,\lambda,f}(P_X, P_G) \leq \text{WAE}_{c,\lambda,f}(P_X, P_G) \leq W_c(P_X, P_G).$$

We now show the opposite direction, which will conclude the proof.

**Lemma 23** *For any metric  $c$  and  $f : \mathbb{R} \rightarrow (-\infty, \infty]$  convex function with  $f(1) = 0$ , if*

$$\lambda \geq \lambda^* = \sup_{P' \in \mathcal{P}(\mathcal{X})} (W_c(P', P_G) / D_f(P', P_G)),$$

*then we have*

$$\text{GAN}_{\lambda f}(P_X, G; \mathcal{H}_c) \geq W_c(P_X, P_G)$$

**Proof** First noting that  $\lambda \geq \sup_{P' \in \mathcal{P}(\mathcal{X})} (W_c(P', P_G) / D_f(P', P_G))$ , for all  $P' \in \mathcal{P}(\mathcal{X})$ , we have

$$\lambda D_f(P', P_G) - W_c(P', P_G) \geq 0.$$

Let  $\tilde{\mathcal{Z}} = \mathcal{X}, \tilde{G} = \text{Id}, P_{\tilde{\mathcal{Z}}} = P_G$  and noting that  $\tilde{G}$  is invertible, we can apply Theorem 8 to get

$$\begin{aligned} \text{GAN}_{\lambda f}(P_X, G; \mathcal{H}_c) &= \overline{W}_{c,\lambda,f}(P_X, \tilde{G} \# P_{\tilde{\mathcal{Z}}}) \\ &= \inf_{E \in \mathcal{F}(\mathcal{X}, \mathcal{P}(\mathcal{X}))} \{ W_c(E \# P_X, P_X) + \lambda D_f(E \# P_X, P_G) \} \\ &\geq \inf_{E \in \mathcal{F}(\mathcal{X}, \mathcal{P}(\mathcal{X}))} \{ W_c(P_X, P_G) - W_c(E \# P_X, P_G) + \lambda D_f(E \# P_X, P_G) \} \\ &\geq \inf_{E \in \mathcal{F}(\mathcal{X}, \mathcal{P}(\mathcal{X}))} \{ W_c(P_X, P_G) \} \\ &= W_c(P_X, P_G). \end{aligned}$$

■

#### A.5 Proof of Theorem 14

We have

$$\begin{aligned} \overline{W}_{c,\lambda,f}(P_X, G) &= \inf_{E \in \mathcal{F}(\mathcal{X}, \mathcal{P}(\mathcal{Z}))} \{ W_c(P_X, (G \circ E) \# P_X) + \lambda D_f(E \# P_X, P_Z) \} \\ &\leq \inf_{E \in \mathcal{F}(\mathcal{X}, \mathcal{P}(\mathcal{Z})): E \# P_X = P_Z} \{ W_c(P_X, (G \circ E) \# P_X) + \lambda D_f(E \# P_X, P_Z) \} \\ &= \inf_{E \in \mathcal{F}(\mathcal{X}, \mathcal{P}(\mathcal{Z})): E \# P_X = P_Z} \{ W_c(P_X, (G \circ E) \# P_X) \} \\ &= \inf_{E \in \mathcal{F}(\mathcal{X}, \mathcal{P}(\mathcal{Z})): E \# P_X = P_Z} \{ W_c(P_X, P_G) \} \\ &= W_c(P_X, P_G). \end{aligned}$$

## References

- [1] Shakir Mohamed and Balaji Lakshminarayanan. Learning in implicit generative models. *arXiv preprint arXiv:1610.03483*, 2016.
- [2] Ian Goodfellow, Jean Pouget-Abadie, Mehdi Mirza, Bing Xu, David Warde-Farley, Sherjil Ozair, Aaron Courville, and Yoshua Bengio. Generative adversarial nets. In *Advances in neural information processing systems*, pages 2672–2680, 2014.
- [3] Sebastian Nowozin, Botond Cseke, and Ryota Tomioka. f-gan: Training generative neural samplers using variational divergence minimization. In *Advances in Neural Information Processing Systems*, pages 271–279, 2016.
- [4] Diederik P Kingma and Max Welling. Auto-encoding variational bayes. *arXiv preprint arXiv:1312.6114*, 2013.
- [5] Ian Goodfellow. Nips 2016 tutorial: Generative adversarial networks. *arXiv preprint arXiv:1701.00160*, 2016.
- [6] Ilya Tolstikhin, Olivier Bousquet, Sylvain Gelly, and Bernhard Schoelkopf. Wasserstein auto-encoders. *arXiv preprint arXiv:1711.01558*, 2017.
- [7] Lars Mescheder, Sebastian Nowozin, and Andreas Geiger. Adversarial variational bayes: Unifying variational autoencoders and generative adversarial networks. *arXiv preprint arXiv:1701.04722*, 2017.
- [8] Alireza Makhzani, Jonathon Shlens, Navdeep Jaitly, Ian Goodfellow, and Brendan Frey. Adversarial autoencoders. *arXiv preprint arXiv:1511.05644*, 2015.
- [9] Vincent Dumoulin, Ishmael Belghazi, Ben Poole, Olivier Mastropietro, Alex Lamb, Martin Arjovsky, and Aaron Courville. Adversarially learned inference. *arXiv preprint arXiv:1606.00704*, 2016.
- [10] Aibek Alanov, Max Kochurov, Daniil Yashkov, and Dmitry Vetrov. Pairwise augmented gans with adversarial reconstruction loss. *arXiv preprint arXiv:1810.04920*, 2018.
- [11] Pengchuan Zhang, Qiang Liu, Dengyong Zhou, Tao Xu, and Xiaodong He. On the discrimination-generalization tradeoff in gans. *arXiv preprint arXiv:1711.02771*, 2017.
- [12] Ke Li and Jitendra Malik. On the implicit assumptions of gans. *arXiv preprint arXiv:1811.12402*, 2018.
- [13] Alfred Müller. Integral probability metrics and their generating classes of functions. *Advances in Applied Probability*, 29(2):429–443, 1997.
- [14] Cédric Villani. *Optimal transport: old and new*, volume 338. Springer Science & Business Media, 2008.
- [15] XuanLong Nguyen, Martin J Wainwright, and Michael I Jordan. Estimating divergence functionals and the likelihood ratio by convex risk minimization. *IEEE Transactions on Information Theory*, 56(11):5847–5861, 2010.
- [16] Matthew D Hoffman and Matthew J Johnson. Elbo surgery: yet another way to carve up the variational evidence lower bound. In *Workshop in Advances in Approximate Bayesian Inference, NIPS*, 2016.
- [17] Shengjia Zhao, Jiaming Song, and Stefano Ermon. Infovae: Information maximizing variational autoencoders. *arXiv preprint arXiv:1706.02262*, 2017.
- [18] Giorgio Patrini, Marcello Carioni, Patrick Forre, Samarth Bhargav, Max Welling, Rianne van den Berg, Tim Genewein, and Frank Nielsen. Sinkhorn autoencoders. *arXiv preprint arXiv:1810.01118*, 2018.
- [19] Zhiting Hu, Zichao Yang, Ruslan Salakhutdinov, and Eric P Xing. On unifying deep generative models. *arXiv preprint arXiv:1706.00550*, 2017.

- [20] Shuang Liu, Olivier Bousquet, and Kamalika Chaudhuri. Approximation and convergence properties of generative adversarial learning. In *Advances in Neural Information Processing Systems*, pages 5545–5553, 2017.
- [21] Shuang Liu and Kamalika Chaudhuri. The inductive bias of restricted f-gans. *arXiv preprint arXiv:1809.04542*, 2018.
- [22] Farzan Farnia and David Tse. A convex duality framework for gans. In *Advances in Neural Information Processing Systems*, pages 5254–5263, 2018.
- [23] Zhiming Zhou, Yuxuan Song, Lantao Yu, Hongwei Wang, Weinan Zhang, Zhihua Zhang, and Yong Yu. Understanding the effectiveness of lipschitz-continuity in generative adversarial nets. 2018.
- [24] Richard Nock, Zac Cranko, Aditya K Menon, Lizhen Qu, and Robert C Williamson. f-gans in an information geometric nutshell. In *Advances in Neural Information Processing Systems*, pages 456–464, 2017.
- [25] Shun-ichi Amari. *Information geometry and its applications*. Springer, 2016.
- [26] Lisa Borland. Ito-langevin equations within generalized thermostatics. *Physics Letters A*, 245(1-2):67–72, 1998.
- [27] Irina Higgins, Loic Matthey, Arka Pal, Christopher Burgess, Xavier Glorot, Matthew Botvinick, Shakir Mohamed, and Alexander Lerchner. beta-vae: Learning basic visual concepts with a constrained variational framework. 2016.
- [28] Alexander Alemi, Ben Poole, Ian Fischer, Joshua Dillon, Rif A Saurous, and Kevin Murphy. Fixing a broken elbo. In *International Conference on Machine Learning*, pages 159–168, 2018.
- [29] Bharath K Sriperumbudur, Kenji Fukumizu, Arthur Gretton, Bernhard Schölkopf, and Gert RG Lanckriet. On integral probability metrics,  $\phi$ -divergences and binary classification. *arXiv preprint arXiv:0901.2698*, 2009.
- [30] Jonathan Weed and Francis Bach. Sharp asymptotic and finite-sample rates of convergence of empirical measures in wasserstein distance. *arXiv preprint arXiv:1707.00087*, 2017.
- [31] Kenneth Falconer. *Fractal geometry: mathematical foundations and applications*. John Wiley & Sons, 2004.
- [32] Peter L Bartlett and Shahar Mendelson. Rademacher and gaussian complexities: Risk bounds and structural results. *Journal of Machine Learning Research*, 3(Nov):463–482, 2002.
